# Supplementary material for: Clinical outcomes of the eight-chop technique in white cataract: a retrospective case series
Source: BMC Ophthalmol. 2026 Apr 29;26:342. doi: 10.1186/s12886-026-04859-w (PMC13277208; doi:10.1186/s12886-026-04859-w)
Supplement: Supplementary file 1 — Supplementary Material 1 [file 12886_2026_4859_MOESM1_ESM.xlsx]

## Sheet: Sheet5
PatientID	Eye	Sex	Age_years	EmeryGrade	Pre_ACD_mm	Pre_axial_length	Pre_BCVA_logMAR	Pre_IOP_mmHg	Pre_CECD_cells_mm2	Pre_CCT_um	Pre_CV	Pre_PHC_percent	OperativeTime_min	PhacoTime_sec	AspirationTime_sec	CDE_uJ	FluidVolume_mL	W7_BCVA_logMAR	W7_IOP_mmHg	W7_CECD_cells_mm2	W7_CCT_um	W7_CV	W7_PHC_percent	W19_BCVA_logMAR	W19_IOP_mmHg	W19_CECD_cells_mm2	W19_CCT_um	W19_CV	W19_PHC_percent
1452	L	M	49	1		24.6	2.39794	11.9	2519		52	50	4.96667	11.2	90	4.79	41	-0.0791812	12.6	2540	546	51	36	-0.0791812	13.7	2557	523	37	47
4096	R	F	65	4.5		22.4	1.69897	15.9	2806				17.6833	37.3	91	20.12	54
4096	L	F	65	4.5		22.4	2	14.9	2619				10.4667	27.1	93	16.06	44
4184	L	M	25	1		24.63	2.39794	15.5	3071	648	34	54	9.51667	7.9	159	2.03	60			2517	645	44	35
5447	R	M	70	4		23.2	2.39794	16.4	3042	578	31	45	7.25	12	100	6.76	50
5502	R	M	70	4		22.2	2	14.5	2567	596	44	27	7.3	17.1	88	9.95	47	0	12.2	2372	686	59	31	0	12.1	2526	603	40	60
5539	L	F	77	4		21.38	1.69897	8.5	3069	503	37	27	11.1	17.1	104	10.1	52			1941	494	55
5562	R	F	65	3.5		22.08	2	15.3	2668	495	38	26	7.26667	10.7	138	5.57	60	0	14.6	2593	500	34	36	0	14.7	2813	504	32	55
5572	R	F	78	4		23.7	2.39794	14.2	2053	588	53		7.5	15.9	127	8.96	65	0	11.4	2115		51	26	0	11.5	2267		38	42
5738	L	F	66	3.5		24.6	2.39794	14.2	2675	511	32	48	5.71667	6.9	112	3.75	57	-0.0791812	12.7	2510	535	43	53	-0.0791812	14	2519	526	35	54
5757	L	M	77	3		22.5	2.39794	11.5	2879	496	51	24	7.26667	10.3	138	3.85	59	0	10.9	2333	493	41	75	0	12.5	2539		62	40
5838	L	M	61	3.5		22.37	2	11.3	2850	527	37	25	7.8	9.7	118	4.35	60	0	13.6	2710	589	50	50
5848	R	F	88	4		23.08	2	12.9	3117	510	38	43	11.1333	18	121	9.83	55	0	12.5
5890	R	M	75	3.5		23.5	2.39794	11.3	2767	592	35	36	6.41667	7.3	116	1.92	50	0		2593	652	42	49
5943	L	F	32	1		24.65	1.30103		3263		39	49	4	0	56	0	21			2976	516	44	61
6343	R	M	61	3.5		23.3	2.39794	12.8	2343	546	39	51	10.2833	23.8	163	12.96	78	-0.0791812		2157	595	45	52
6402	R	M	49	2		24.73	2	13.5	2846	564	56	44	5.95	0.3	117	0.08	38	-0.0791812	12.8	2670	612	56	47
6402	L	M	49	1		25.08	2	11	2513	547	50	38	6.65	1.2	115	0.22	42	-0.0791812	13.4	2621	595	58	42
6419	R	M	61	3.5		27.7	1.39794	10	2776	552	46	54	15.1667	26.8	129	12.37	51	0	10.2	3042	610	44	46
6793	R	F	61	4		22.3	2.39794	13.7	2495	651	73	29	10.6833	34.3	132	16.99	57	0	12.4		622	53	33
6861	R	M	68	4.5		22.8	2.39794	20.9	2240	581	75	31	8.88333	32.3	128	14.87	51		14.1	2491	520	49	25		12	2200	591	31	33
6861	L	M	70	4		22.8	2.39794	16.8	2865	565	37	49	8.98333	26.1	143	12.87	54		14.1	2034		50			11.4	1521	553	47	33
6904	L	F	57	2		24.22	2	17.8	2802	563	54	26	9.6	12.3	115	2.91	47	-0.0791812	17.4	2201	559	79	41	0	15.3	2575	551	44	27
7073	L	M	72	4		23.8	1.52288	16.3	2792	531	40	53	6.28333	20	119	11.11	56	0	13.9	2414	526	36	58	0	13.5	2437	522	30	56
7104	R	F	31	1		23.85	1.52288	14.6	2323	526	54	20	7.33333	0	58	0	18	-0.0791812	15.8	2758	525	42	37	-0.0791812	17.4		523	45
7104	L	F	31	1		23.88	1.69897	14.6	2488	511	70	40	6.11667	0	68	0	19	-0.0791812	14.1	2493	506	56	36	-0.0791812	15.6	2631	497	42	36
7322	R	M	49	2.5		25.01	2	18.2	2590	645	47	54	6.6	11.3	92	3.76	38	-0.0791812	15.3	2622	663	39	42
7669	L	F	59	4.5		21.95	2.39794	14.3	2942	543	39	55	11.65	48.9	199	20.51	96	0.09691	12.9	2884	702	43	53
7821	R	F	76	3.5		23.7	2	10.4	2564	500	48	47	4.5	16.6	71	8.51	28	0	10	2785	513	47	41	0	9.1	2673	511	39	40
8218	L	F	74	4		20.7	0.69897	15	2424	557	47	36	17.25	17.6	89	7.59	40	-0.0791812	14.7	2376	553	39	41	-0.0791812	13.9	2222	558	39	32
8219	R	F	80	4		22.4	2.39794	8.1	2480	527	44	36	17.6	11	84	6.5	38	0.09691	7.8	2238		51	30
8326	L	F	69	3.5		25.4	2.39794	13.3	2463	465	39	49	8.71667	14.7	92	7.44	41	0.0457575	13.1	2334	465	43	37	0	12.1
8343	L	M	46	1		24.95	1.69897	11.9	2673	517	37	46	19.6667	20.7	175	6.26	66	-0.0791812	13.3	2303	539	43		-0.0791812	12.8	2511	527	31	42
8732	L	M	57	3.5		23.5	2.39794	13.3					10.1667	23.2	175	7.66	63	-0.0791812	13.3	2071	559	51	32			2064	513	49	36
8769	R	M	55	3		24.4	2	17.7	2663	582	40	47	10.3333	13.8	91	3.63	39
8825	L	M	54	3		23.9	2.39794	18.2	2598	493	38	48	7.35	24.8	161	9.11	68	-0.0791812	17.5	2468	491	37	44	-0.0791812	15.7	2587	478	35	45
9006	L	F	76	4.5		22.35	2.39794	11.7	2337	484	37	47	17.05	56.2	209	24.87	100		9.5	2208	477	39	41
9021	R	M	68	4.5		23.1	2.39794	10.5	2818	548	42	51	7.71667	19.9	95	9.6	44	-0.0791812	11.5	218		54		-0.0791812	11.4	2690	535	40	48
9130	L	F	70	3		24.75	2	10.3	2344	457	42	43	7.3	25.7	120	11.69	51	0.0457575	11	2489	490	41	38	0.0457575	9.9	2491	481	44	34
9139	R	M	66	4.5		24.15	2.39794	15.7	2482	529	41	42	8.61667	21.9	119	9.59	53		11.2	2415	518	40	36
9166	R	M	38	1		26.8	2.39794	11.5		497	50	22	6.85	4.4	89	1.7	32	-0.0791812	13.8		496	50	30	-0.0791812	13.9	2341	487	48	35
9231	L	F	77	4.5		23.67	2.39794	10.1					11.35	45.3	224	16.16	82	-0.0791812	10.5	1656	496	38	51	-0.0791812	10.1	1523	508	35	46
9419	R	F	67	4.5		22.5	2.39794	10.6	2639	511	37	52	10.6833	28.9	159	14.92	59	-0.0791812	11	2313	490	45	39	-0.0791812	10.8	2258	493	41	46
9572	L	M	74	4.5		24.28	2.39794	12.6	2372	548	53	33	8.58333	28.2	131	11.7	56	0.09691	12.4	2342	569	47	38				581
9615	L	M	88	4.5		24.12	2.39794	14	2369	506	54	40	11.25	31.2	166	15.23	64	-0.0791812	14.6	2398	502	50	42
9753	R	M	77	4.5		23.58	2	10.5	2189	490	52	39	9.2	27.9	167	17.84	68
9857	L	M	64	4.5		23.6	2	14.1	2412	539	35	49	8.1	28.4	132	12.28	52	-0.0791812	11	2341	581	43	44
9941	R	F	82	4.5		23.38	2.39794	13.1	2846	527	39	48	9.25	50	170	24.54	77	0	12.2	2370	532	70	36
10057	R	M	61	4		22.85	2	15.1	2552	629	52	44	8.76667	22.5	131	8	56	0.0457575	13.7	3238	645	38	55	0	14.1	2505	630	45
10058	R	M	73	4.5		23.5	2.39794	13	2487	593	55	37	13.9167	27.2	143	13.4	55	0	11.8	2927	541	41	41	0	11.9	2741	545	45	46
10077	L	F	36	3.5		25.93	2.39794	14.3	2711	611	39	49	19.4167	26.8	174	10.43	64
10123	R	F	69	4.5		22.75	2	15	2090	500	45	35	16.9667	39.8	149	20.85	65	0.0457575	12.5	1519	502	39	42
10321	R	F	75	3.5		23.6	2	11.5	2614	540	39	40	7.86667	22.3	129	7.35	60
10334	L	F	66	4.5		22.45	2	15.6	2809	597	52	46	8.71667	16	114	6.99	49	-0.0791812	15.3	2979	652	42	43
10335	L	F	83	4		22.28	2	17.7	2603	545	32	57	7.38333	15.9	129	3.83	59	-0.0791812	13.1	2598	560	35	53
10644	L	M	71	4		24.5	2.39794	15.2	2947	568	33	47	11.5	45.8	229	19.1	82	0.0457575	15.3	2627	568	34	48	0	14.9	2633	568	42	38
10771	R	F	70	4		23.35	2.39794	11					8.5	45.9	184	21.4	83		7						6.3
10788	R	M	61	4		23.58	2.39794	13.6	2280	551	49	34	10.8833	14.8	141	8.39	54	-0.0791812	12.3	2100	565	54	35	-0.0791812	12.9	2285	563	47	35
10791	R	F	84	4.5		23	2	14.1	2928	522	49	40	8.55	22.2	111	12.25	48	0.09691	12.8	2717		47	39
10814	R	F	64	4.5		22.88	2.39794	14.5	2548	576	40	46	17.35	28.6	120	12.39	54	-0.0791812	13.2	1416	577	48	33	0	13	1115		48	48
10821	R	M	53	2		25.65	2	14.2	2449	616	44	37	9.53333	9	219	2.22	77	-0.0791812	13.6	2638		41	37	-0.0791812	16.4	2680		39	41
10826	R	F	65	4		24.08	2	17.3	2198	625	86	46	10.9667	28.7	160	8.46	74	-0.0791812	16.4	2378	643	42	28	-0.0791812	18.7	2372	633	41	42
10936	R	M	73	4.5			2.39794	13.4	2337	558	46	37	10.8833	45.1	152	16.54	65	0.39794	11.5	2275	620	48	35	0.30103	9	2367	584	45	34
10952	L	F	87	4.5		21.26	2	13.9	2763	472	42	52	11.8833	26	162	14.19	72	-0.0791812	11.5	2763	484	37	44	-0.0791812	12.1	2633	492	33	49
11126	R	M	60	3.5		24.6	2	15.3	2812	543	36	43	8.26667	39.1	116	16.18	50	0	17.8	2752	563	36	42	0.0457575	14.1	2711	543	41	40
11172	R	M	42	3.5		25.18	2.39794	12.7	2423	529	45	45	8.31667	11.4	169	4.46	62	-0.0791812	13	2507	506	35	41
11534	R	M	54	4		24.3	2.39794	14.7	2402	530	35	47	9.68333	18.2	164	6.39	71	-0.0791812	14.7	2323	540	36	48	-0.0791812	14.7	2342	553	34	44
11764	L	F	62	3.5		22.6	2	12.3	2564	496	37	46	8.26667	22.6	117	12.1	46	-0.0791812	12.5	2758	508	34	48	-0.0791812	11.4	2638	514	33	56
11901	L	M	59	3		23.5	2.39794	16					7.48333	11	131	1.86	52	0.09691	16.1
11982	R	F	81	4.5		22.1	3	16					16.2833	57.2	146	29.55	50		11.9
12071	R	M	60	4		25.35	2.39794	14.9	2596		44	41	11.4667	23.9	157	13.6	53
12072	L	F	74	4		23	2.39794	14.7	2685	550	42	43	12.0167	57.3	233	22.14	92	-0.0791812	13.6					-0.0791812	11.4	2668	538	45	45
12352	R	M	86	4.5		23.5	2	12.7	2313	521	57	23	14.4	40.6	148	18.17	63			2051		68	36
12355	R	F	66	4		23.1	2.39794		2498	616	41	41	9.33333	44.2	209	12.83	87			2520	624	45	45			2279		45	28
13465	L	M	40	3.5		23.28	2	13.6	2989		32	55	9.68333	3.6	174	0.51	69	-0.0791812	12.3	2743	525	39	39
13764	L	M	61	3.5		23.9	2.39794	12.7	2856	521	38	51	8.51667	53.4	178	24.17	79	-0.0791812	8.3	2557	594	44	34
14059	R	M	65	4		22.33	1.69897	11.4	2958	482	39	45	18.1667	37.3	251	16.77	94	-0.0791812	13.7	2838	477	37	45	-0.0791812	13.3	2810	469	39	40
14926	L	M	69	4.5		23.01	2.39794	12.3	2598	474	48	32	20.4833	43.8	210	17.5	79	-0.0791812	11.1					-0.0791812	9.4	2150	452	51
15506	R	M	51	3		23.86	2.39794	15.3	2828	622	41	48	23.3833	8.8	184	3.81	70	-0.0791812	14.8
15578	R	F	76	4		22.8	2.39794	15.4	2677	554	35	52	20.5	71.6	287	29.71	112		11.4						11.3
15975	L	M	90	4		23.23	2.39794	10.5	2592	519	40	48	16.1667	47.2	183	19.04	78	0.0457575	7.3					0.0457575	9.7	2220	509	36	38
16544	R	M	69	4.5	2.78	23.5	2.39794	10.5	2728	538	41	43	13.5	39	165	18.54	61	-0.0791812	10.6	2229	587	46	31	-0.0791812	10.9
16647	R	M	83	4.5		24.7	2.39794	11.1	2567	524	47	30	20.95	49.6	184	24.72	73	0	12.2	2382	502	45	28	0	11.4	2313		45	38
17001	R	F	65	4.5	4.38	25.3	2	15.1	2962	577	41	49	22.05	29.2	167	13.05	59		15.1	2672	584	49	39			2820	585	34	52
17240	L	F	82	4.5	3.04	21.79	2	12.7	2644	497	35	47	20.7333	27.8	189	10.69	77	-0.0791812	9.6	2598	511	38	55	-0.0791812	12.3	2526	484	36	44
17274	L	M	85	4.5	3.14	22.95	2.39794	8.9	2298	532	45	44	22.7167	51.9	227	27.65	89	0.09691	8.7	2591	509	38	46	0.09691	10.7
17409	L	M	43	2.5	3.79	25.3	2	14.8	2692	567	34	46	9.33333	56	167	16.11	66			2693	613	38	50
17569	R	M	57	3.5	3.67	24.44	2.39794	14.9	2398	569	39	42	16.4667	14.7	114	4.16	44	-0.0791812	11.7	2480	610	35	48	-0.0791812	12.3	2501	583	36	50
17752	L	M	54	4	3.88	26.26	1.69897	11.9	2310	481	32	47	12.15	22.4	210	7.27	64	-0.0791812	12.3	2506	525	32	57
17950	L	M	84	4	3.13	24.16	2	7.7	2224	522	63	34	12.7833	22.6	176	11.34	69	-0.0791812	10.3	2229	550	44	32
18360	R	M	74	3	3.15	23.28	1.69897	14.5	2711	589	35	46	12.8	6.8	212	1.79	71	-0.0791812	13	2700	613	30	51	-0.0791812	14.8	2772	602	36	55
18360	L	M	74	3.5	3.16	23.12	1.52288	15	2898	589	44	46	14.4333	9.8	178	2.88	58	-0.0791812	12.9	2790	604	29	51	-0.0791812	13.5	2795	585	36	50
18570	L	M	79	4.5	3.13	23.24	1.69897	11.2	2908	498	51	41	13.1167	37.9	116	19.39	41	0	11.5	2884	517	38	45	0	10.9	2925	508	37	52
18728	R	F	87	4	2.95	22.74	1.69897	16.6	2918	546	52	42	9.18333	25.6	85	10.72	37	0.09691	10.7	2763	595	45	44	0.09691	13.7	2834	565	42	41
19007	L	F	77	4.5	3.79	23.7	2.39794	12.1	2687	483	37	47	13.4833	61.9	176	31.04	62	-0.0791812	10.6	2645	488	35	49	-0.0791812	11.5	2625	493	32	52
19044	R	F	73	4		22.55	2.39794	15.9	2882	591	37	50	12.75	32.6	146	10.01	57	-0.0791812	13.8	2835	542	39	45
19044	L	F	73	4		22.6	2.39794	16.9	2960	576	35	49	14.8833	52.3	189	20.72	76	-0.0791812	13.3	2944	546	37	44
19094	L	F	78	4.5	2.9	22.73	2.39794	14.3	2790	466	42	40	23.5	41.6	118	18.5	46		10.6	2734	466	38	42		11.2	2751	479	37	42
19249	R	F	52	2.5	2.45	24.6	2.39794	13.4	2899	564	44	43	14.8667	17.6	171	5.3	68	-0.0791812	11.2	3086	663	40	41	-0.0791812	14.1	3075	594	38	51
19535	R	M	75	4.5	3.91	23.38	2	13.9	3049	564	44	44	14.9833	70.1	185	25.02	72	-0.0791812	15	3086	555	44	42	-0.0791812	15	3175	565	42	44
19580	R	F	66	2	2.53	23.32	1.69897	15	2414	520	42	40	10.7667	8.2	156	1.15	57	-0.0791812	14.4	2495	524	45	33	-0.0791812	13.4	2480	520	47	47
20209	R	M	64	4	3.05	22.56	2	12.5	2865	517	29	59	18.0833	43.9	130	18.59	53	-0.0791812	13.3	2823	525	30	52	-0.0791812	12.9	2804	541	29	61
20308	L	M	51	1	2.53	24.7	2	15.1	1670	541	46	41	14.75	0	249	0	91	-0.0791812	12.7	1689	559	46	33
20324	L	F	90	4.5	2.18	22.95	2.39794	16.7	2781	532	36	48	9.8	28.3	113	12.27	45	0.0457575	13	2328	565	41	34	0.0457575	13.2	2355	554	33	39
20346	L	F	78	4.5	2.7	22.84	2	14.1	2853	544	37	45	12.4667	49.3	178	19.16	749	0.09691	10.9	2858	572	40	43	0.09691	10.4	2843	568	38	41
